# Supplementary material
Source: publisher site journal article supplement (https://www.dovepress.com/article/406237)
Supplement: Supplementary file 1 [file get_supplementary_file.php]

**Supplemental Table 1.** Prevalence rates for different BMI categories by age groups in Chinese aged population.

|  | 60-64y | 65-69y | 70-74y | 75-79y | ≥80y |
| --- | --- | --- | --- | --- | --- |
| Underweight (%) | 1.9 | 1.6 | 2 | 3.6 | 5.2 |
| Overweight (%) | 44 | 44 | 43.2 | 41.1 | 36.1 |
| Obesity (%) | 12.6 | 15.4 | 16.2 | 15.9 | 11.8 |

**Note:** BMI was categorized as underweight (<18.5 kg/m2), overweight (24.0 kg/m2~27.9 kg/m2) and obesity (≥28 kg/m2).

**Supplementary Figure 1. Self-reported questionnaire for hypertension, diabetes, dyslipidemia, and cancer**

**Q1**. Have you ever been confirmed with hypertension by a doctor?

**Answer**: Yes ⬜ No ⬜

**Q2**. Have you ever been confirmed with diabetes by a doctor?

**Answer**: Yes ⬜ No ⬜

**Q3**. Have you ever been confirmed with dyslipidemia by a doctor?

**Answer**: Yes ⬜ No ⬜

**Q4**. Have you ever been confirmed with hypertension by a doctor?

**Answer**: Yes ⬜ No ⬜
